# Supplementary material for: Tightly intercalated Ti3C2Tx/MoO3−x/PEDOT:PSS free-standing films with high volumetric/gravimetric performance for flexible solid-state supercapacitors
Source: Royal Society of Chemistry journal article supplement (doi:10.1039/d2dt03467k), 2022-12-12
Supplement: d2dt03467k1.pdf [file d2dt03467k1.pdf]

Supporting Information

**Tightly intercalated  $\text{Ti}_3\text{C}_2\text{T}_x/\text{MoO}_{3-x}/\text{PEDOT:PSS}$  free-standing films  
with high volumetric/gravimetric performance for flexible solid-state  
supercapacitors**

Pengxue Zhang<sup>a</sup>, Yan Sui<sup>a</sup>, Weijing Ma<sup>a</sup>, Nannan Duan<sup>a</sup>, Qi Liu<sup>a</sup>, Bingmiao Zhang<sup>a</sup>,  
Haijun Niu<sup>a,b</sup>, Chuanli Qin<sup>a,b\*</sup>

<sup>a</sup> School of Chemistry and Material Science, Heilongjiang University, Harbin, 150080,  
China.

<sup>b</sup> Key Laboratory of Chemical Engineering Process & Technology for High-efficiency  
Conversion, College of Heilongjiang Province, Harbin, 150080, China.

\* Email: qinchuanli@hlju.edu.cn. Tel: +86-0451-8660-8543.

## **Materials and Methods**

### **Synthesis of MoO<sub>3-x</sub> Nanobelts**

0.24 g molybdenum powder was slowly added to 5 mL of 30% H<sub>2</sub>O<sub>2</sub> and stirred for 10 min in an ice-water bath. After it was cooled to room temperature, 25 mL of deionized water and 5 mL of anhydrous ethanol were added, stirred until the solution turned yellow and then transferred to a stainless steel reactor for 18 h at 120 °C. Finally, MoO<sub>3-x</sub> nanobelts were washed repeatedly with distilled water and ethanol, then dried in a vacuum oven at 60 °C for 12 h.

### **Synthesis of Ti<sub>3</sub>C<sub>2</sub>T<sub>x</sub> dispersion**

1.0 g LiF and 20 mL of 9 M HCl aqueous solution were stirred for 10 min in an ice-water bath, and then 1.0 g Ti<sub>3</sub>AlC<sub>2</sub> was slowly added to the above solution and stirred at 35 °C for 24 h. After the suspension was centrifuged at 3500 rpm for 5 min, the supernatant was decanted and washed with deionized water. The centrifugation process was repeated until pH of the supernatant was about 6. Finally, the precipitate was re-dispersed in deionized water and further sonicated for 1 h. After centrifuging at 3500 rpm for 1 h, the supernatant was taken as the Ti<sub>3</sub>C<sub>2</sub>T<sub>x</sub> dispersions (1.5 mg mL<sup>-1</sup>).

### **Synthesis of Ti<sub>3</sub>C<sub>2</sub>T<sub>x</sub>/MoO<sub>3-x</sub>/PEDOT:PSS free-standing films**

A certain amount of 1 mg mL<sup>-1</sup> MoO<sub>3-x</sub> aqueous suspension and 100 μL of 1.5 wt % PEDOT:PSS aqueous solution were added to 10 mL of 1.5 mg mL<sup>-1</sup> Ti<sub>3</sub>C<sub>2</sub>T<sub>x</sub> dispersions by sonication for 30 min and stirred for 2 h. The free-standing films were obtained by vacuum filtration of the mixed suspension using PTFE membrane. At last, Ti<sub>3</sub>C<sub>2</sub>T<sub>x</sub>/MoO<sub>3-x</sub>/PEDOT:PSS free-standing films were obtained by soaking in 18 M H<sub>2</sub>SO<sub>4</sub> solution for 24 h, washing with deionized water for several times and drying in the oven for 8 h at 60 °C to remove PSS. The Ti<sub>3</sub>C<sub>2</sub>T<sub>x</sub>/MoO<sub>3-x</sub>/PEDOT:PSS free-standing films with different amounts of MoO<sub>3-x</sub> were named as TMP-1, TMP-2 and TMP-3, respectively. By comparison, Ti<sub>3</sub>C<sub>2</sub>T<sub>x</sub>, Ti<sub>3</sub>C<sub>2</sub>T<sub>x</sub>/MoO<sub>3-x</sub> and Ti<sub>3</sub>C<sub>2</sub>T<sub>x</sub>/PEDOT:PSS free-standing films were also synthesized with the same process. The detailed experimental parameters can be found in Table S1. Meanwhile, the Ti<sub>3</sub>C<sub>2</sub>T<sub>x</sub>/MoO<sub>3-x</sub>/PEDOT:PSS free-standing films without H<sub>2</sub>SO<sub>4</sub> soaking were also

obtained, which are named as TMP-U-1, TMP-U-2 and TMP-U-3, respectively.

### **Preparation of electrodes**

2 mg of free-standing film was put between two pieces of stainless steel mesh, which is used as the collector in our work, and then pressed with the tablet press machine to obtain the electrode.

### **Preparation of flexible solid-state symmetrical supercapacitors**

First, the PVA-H<sub>2</sub>SO<sub>4</sub> gel electrolyte is prepared. 3.0 g PVA and 30 mL of 1M H<sub>2</sub>SO<sub>4</sub> aqueous solution were stirred at 90 °C for 30 minutes until the solution became homogeneous and clear. Next, the resulting solution was cast into a mold and cooled to room temperature, followed by a freeze-thaw process (-20°C for 8 hours and thawed at room temperature for 3 hours, three times) to form the PVA-H<sub>2</sub>SO<sub>4</sub> gel electrolyte. After that, the gel electrolyte was placed between two identical electrodes to assemble a flexible solid-state supercapacitor, which was sealed with the hot-melt adhesives after wrapped with PET film.

### **Characterization**

Scanning electron microscopy (SEM, Zeiss, Gemini SEM 300, Germany) and transmission electron microscopy (TEM, Hitachi, H7650, Japan) were used to study the morphology and microstructure of samples. X-ray diffraction (XRD, Bruker, D8 ADVANCE, Germany) analysis was performed to study the phase structure using Cu K $\alpha$  radiation at 40 kV and 30 mA. Fourier transform infrared (FTIR) spectra were collected using detected with a Bruker Equinox 55 spectrometer, using the KBr pellet technique. X-ray photoelectron spectroscopy (XPS) experiments were performed using an ESCALAB 250 electron spectrometer (Thermo Fisher Scientific, USA) to confirm the composition and elemental chemical state on the surface of samples. A remote computer-controlled contact angle goniometer system (Dataphysics oca-20, Germany) was used to examine the surface wettability of samples.

### **Electrochemical measurements**

In the three-electrode system, the prepared electrodes were used as working electrodes, and Ag/AgCl and platinum foils were used as reference and counter electrodes, respectively. Cyclic voltammetry (CV) tests were performed by a

computerized electrical analysis system (Tianjin Lannico, LK98B II, China) in the potential window range of -0.4 to 0.3 V. An electrochemical workstation (Shanghai Chenhua, CHI660E, China) was used for charge/discharge (GCD) measurements with the same potential window at constant currents. Electrochemical impedance spectroscopy (EIS) measurements were performed over a frequency range of 0.01 Hz to 100 kHz with an amplitude of 10 mV-0.1 V at open-circuit potentials of -0.1 V with the same electrochemical workstation as the GCD measurements. All three-electrode measurements were performed at room temperature in 1 M H<sub>2</sub>SO<sub>4</sub> aqueous solution.

The density ( $\rho$ ) of free-standing films is calculated according to equation (S1).

$$\rho = \frac{m}{s \times d} \quad (\text{S1})$$

where  $m$  (g),  $s$  (cm<sup>2</sup>) and  $d$  (cm) are the mass, area and thickness of free-standing films, respectively.

The specific capacitance of film electrode materials can be calculated from the GCD curve using the following equations.

$$C_{g,1} = \frac{I \times \Delta t}{m \times \Delta V} \quad (\text{S2})$$

$$C_{v,1} = \rho \times C_{g,1} \quad (\text{S3})$$

where  $C_{g,1}$  (F g<sup>-1</sup>) and  $C_{v,1}$  (F cm<sup>-3</sup>) are the volumetric capacitance and gravimetric capacitance of film electrode materials, respectively,  $I$  (A) is the applied current,  $\Delta t$  (s) is the discharge time,  $m$  (g) is the mass of film electrode materials, and  $\Delta V$  (V) is the potential range after the IR drop.

In the two-electrode system, GCD and CV measurements were performed using a battery test system (Landian, CT2001A, China) and a computerized electrical analysis system LK98B II, respectively. The specific capacitance, power density and energy density of symmetrical supercapacitors were calculated from the GCD curves according to the following equations.

$$C_{g,2} = \frac{I \times \Delta t}{m \times \Delta V} \quad (\text{S4})$$

$$C_{v,2} = \rho \times C_{g,2} \quad (\text{S5})$$

$$E_{g,2} = \frac{C_{g,2} \times \Delta V^2}{7.2} \quad (\text{S6})$$

$$P_{g,2} = \frac{3600 \times E_{g,2}}{\Delta t} \quad (S7)$$

$$E_{v,2} = \frac{C_{v,2} \times \Delta V^2}{7.2} \quad (S8)$$

$$P_{v,2} = \frac{3600 \times E_{v,2}}{\Delta t} \quad (S9)$$

where  $C_{g,2}$  ( $F g^{-1}$ ) and  $C_{v,2}$  ( $F cm^{-3}$ ) are the volumetric and gravimetric capacitances of supercapacitors, respectively;  $I$  (A) is the applied current;  $\Delta t$  (s) is the discharge time;  $m$  (g) is the mass of film electrode materials on the two electrodes;  $\Delta V$  (V) is the potential range after IR drop;  $\rho$  is the density of film electrode materials ( $g cm^{-3}$ );  $P_{g,2}$  ( $W kg^{-1}$ ) is the gravimetric power density;  $E_{g,2}$  is the gravimetric energy density ( $Wh kg^{-1}$ );  $P_{v,2}$  is the volumetric power density ( $W L^{-1}$ );  $E_{v,2}$  is the volumetric energy density ( $Wh L^{-1}$ )

## Results and discussion

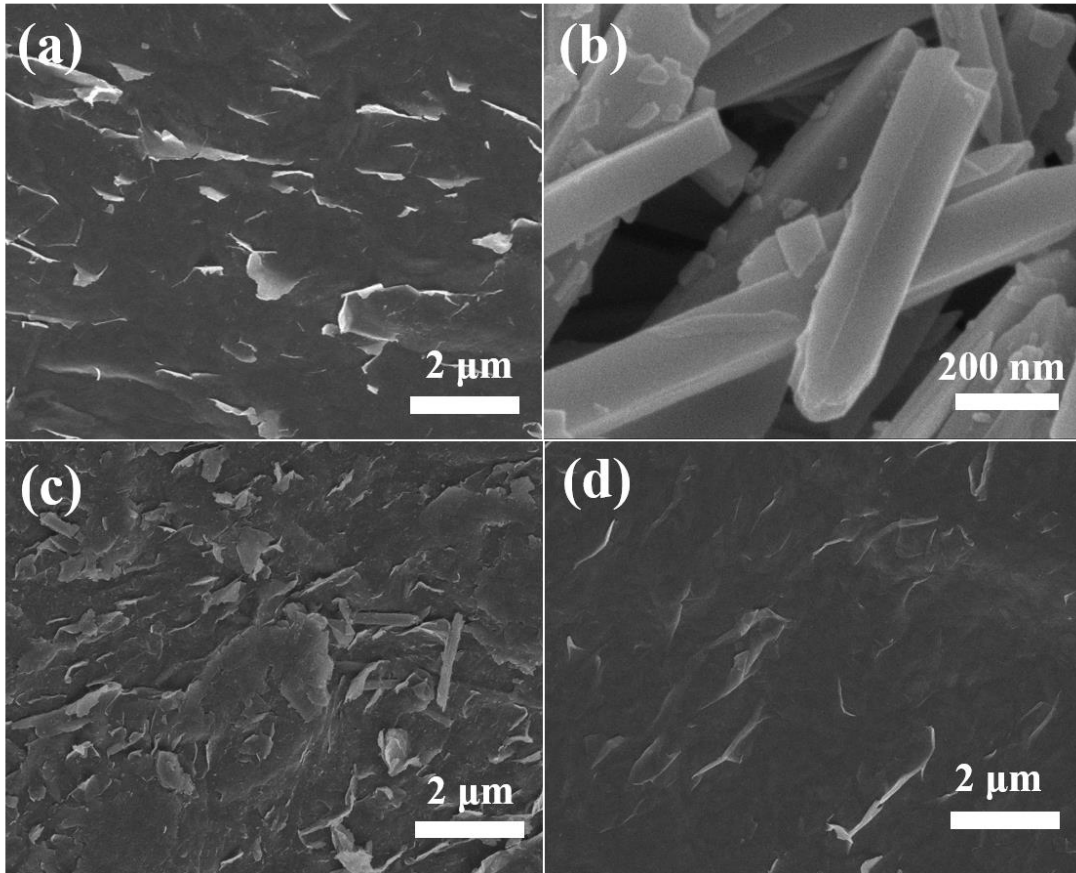

Fig.S1. SEM images of (a)  $Ti_3C_2T_x$ ; (b)  $MoO_{3-x}$ ; (c)  $Ti_3C_2T_x/MoO_{3-x}$ ; (d)  $Ti_3C_2T_x/PEDOT:PSS$ .

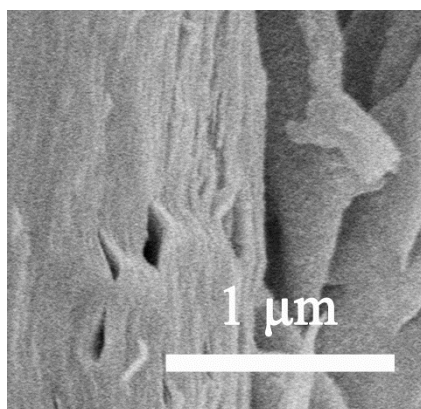

Fig.S2. Cross-sectional SEM image of Ti<sub>3</sub>C<sub>2</sub>T<sub>x</sub>.

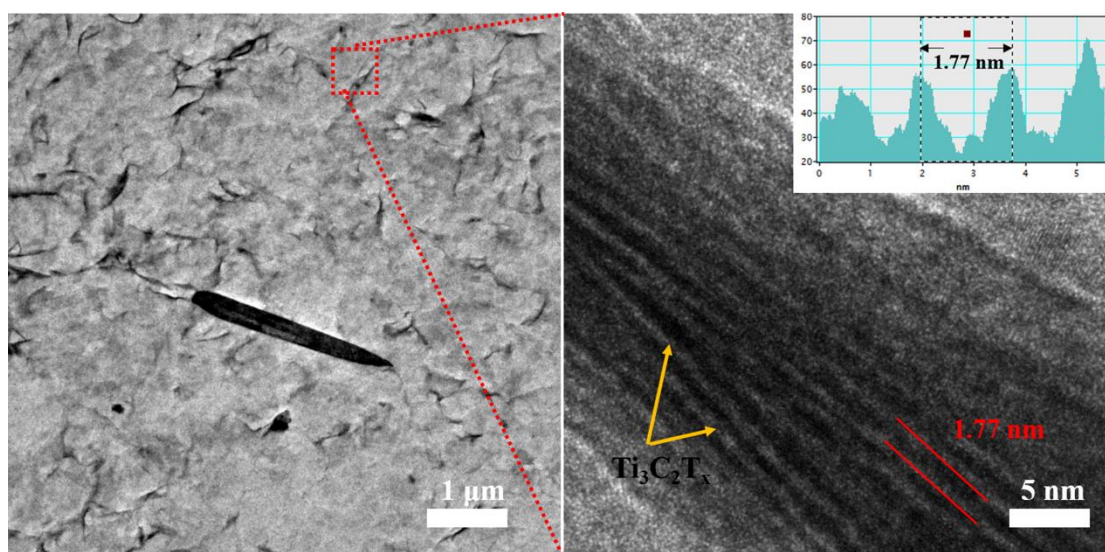

Fig.S3. (a) TEM and (b) HRTEM images of TMP-2.

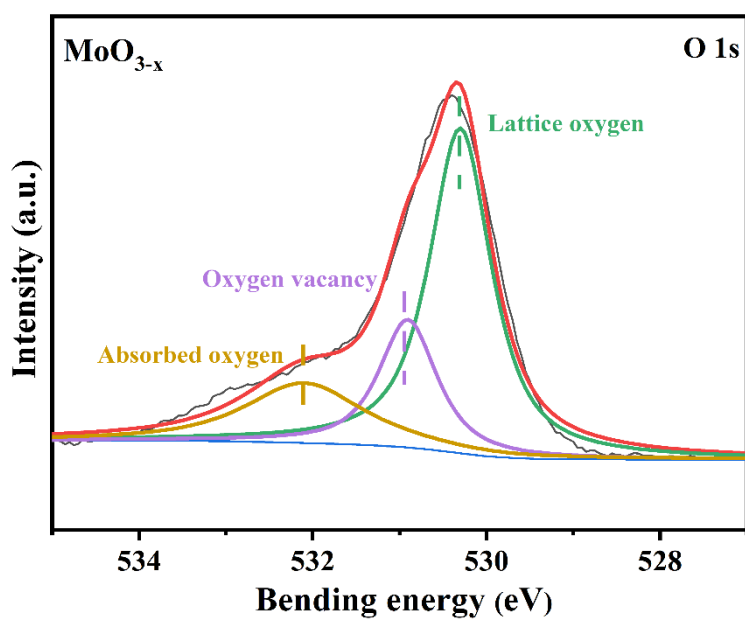

Fig.S4. High resolution O1s XPS spectra of MoO<sub>3-x</sub>.

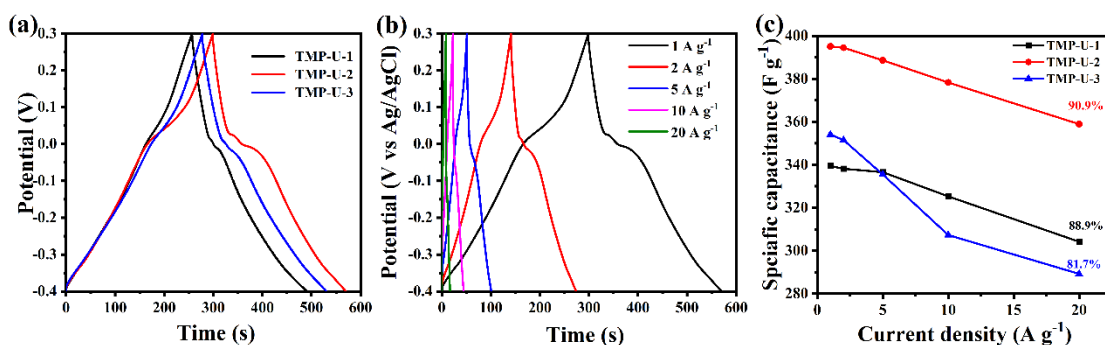

Fig.S5. GCD curves of (a) different samples at 1 A g<sup>-1</sup> and (b) TMP-U-2 at different current densities; (c) Gravimetric capacitance of the as-prepared film electrodes as a function of current density.

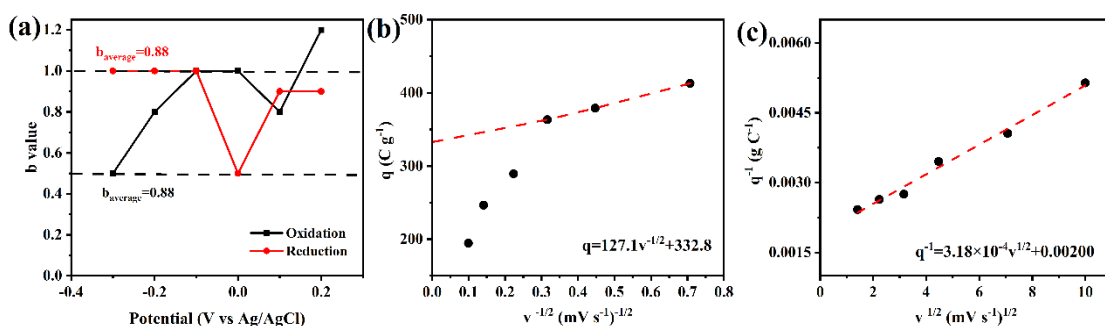

Fig.S6. (a) Calculated *b* value of TMP-2 for the oxidized and reduced portions vs potential; Dependence of (b) *q* on *v*<sup>1/2</sup> and (c) *q*<sup>-1</sup> on *v*<sup>1/2</sup> for TMP-2 electrodes in 1 M H<sub>2</sub>SO<sub>4</sub>.

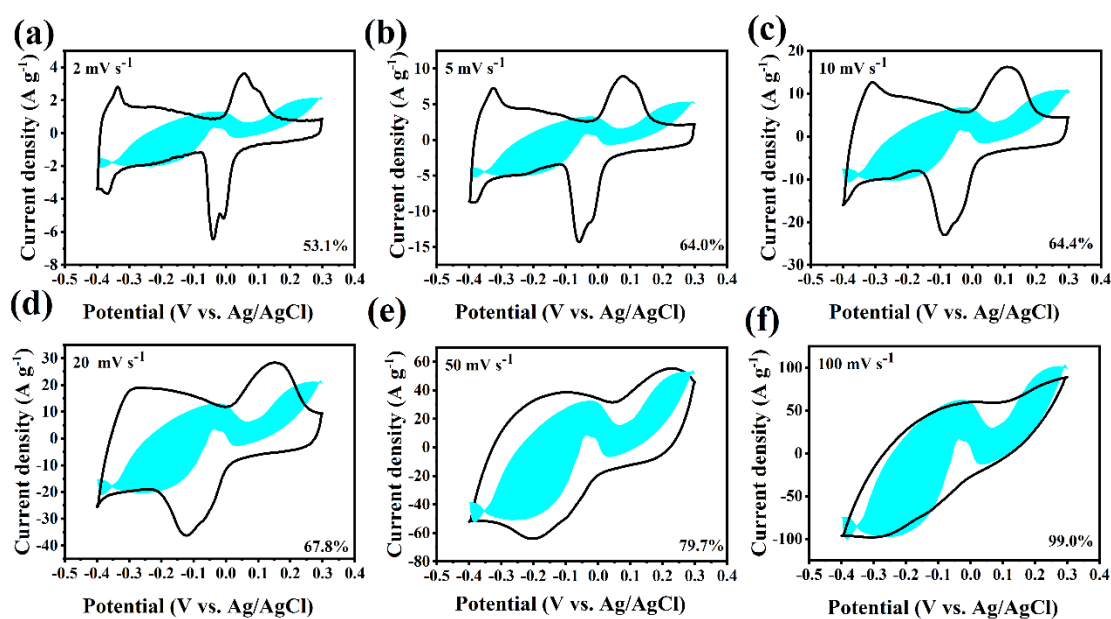

Fig.S7. CV curves of TMP-2 with separation between total currents (black line) and capacitive currents (blue shadow) at (a)2, (b)5, (c) 10, (d) 20, (e) 50 and (f) 100 mV s<sup>-1</sup>.

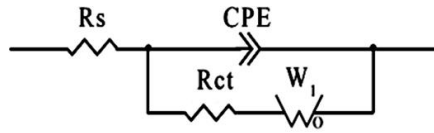

Fig.S8. Nyquist plots of the corresponding equivalent circuit model.

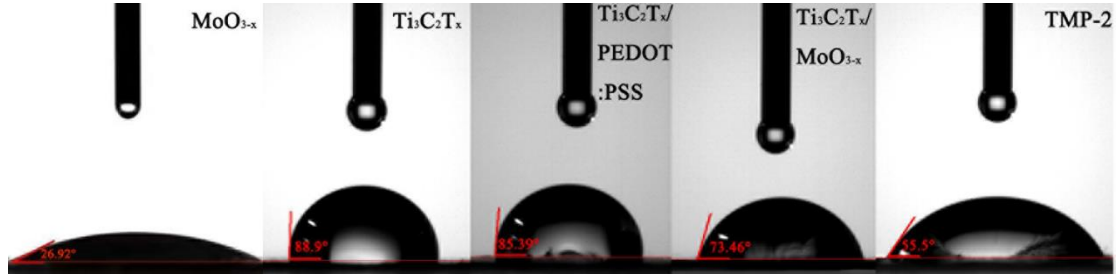

Fig.S9. Water contact angle of samples.

Table S1. Experimental parameters of samples.

| Samples                                                           | MXene<br>(1.5 mg mL <sup>-1</sup> ) | MoO <sub>3-x</sub> | PEDOT:PSS<br>(1.5 wt%) |
|-------------------------------------------------------------------|-------------------------------------|--------------------|------------------------|
| Ti <sub>3</sub> C <sub>2</sub> T <sub>x</sub>                     | 10 mL                               | ----               | ----                   |
| Ti <sub>3</sub> C <sub>2</sub> T <sub>x</sub> /MoO <sub>3-x</sub> | 10 mL                               | 6.42 mg            | ----                   |
| Ti <sub>3</sub> C <sub>2</sub> T <sub>x</sub> /PEDOT:PSS          | 10 mL                               | ----               | 100 μL                 |
| TMP-1                                                             | 10 mL                               | 3.75 mg            | 100 μL                 |
| TMP-2                                                             | 10 mL                               | 6.42 mg            | 100 μL                 |
| TMP-3                                                             | 10 mL                               | 10.00 mg           | 100 μL                 |

Table S2. Ti 2p XPS spectra fitting results of Ti<sub>3</sub>C<sub>2</sub>T<sub>x</sub> and TMP-2.

| Samples                                       | Region                                    | Assigned to      | BE [eV]       |
|-----------------------------------------------|-------------------------------------------|------------------|---------------|
| Ti <sub>3</sub> C <sub>2</sub> T <sub>x</sub> | Ti 2p <sub>3/2</sub> (2p <sub>1/2</sub> ) | Ti-C             | 454.9 (460.7) |
|                                               |                                           | Ti <sup>2+</sup> | 455.7 (461.3) |
|                                               |                                           | Ti <sup>3+</sup> | 456.6 (462.2) |
|                                               |                                           | TiO <sub>2</sub> | 458.6 (463.3) |
| TMP-2                                         | Ti 2p <sub>3/2</sub> (2p <sub>1/2</sub> ) | Ti-C             | 454.8 (460.7) |
|                                               |                                           | Ti <sup>2+</sup> | 455.7 (461.3) |
|                                               |                                           | Ti <sup>3+</sup> | 456.6 (462.1) |
|                                               |                                           | TiO <sub>2</sub> | 458.6 (463.3) |

Table S3. Mo 3d XPS spectra fitting results of MoO<sub>3-x</sub> and TMP-2.

| Samples            | Region                                    | Assigned to      | BE [eV]       |
|--------------------|-------------------------------------------|------------------|---------------|
| MoO <sub>3-x</sub> | Mo 3d <sub>5/2</sub> (3d <sub>3/2</sub> ) | Mo <sup>6+</sup> | 232.7 (235.8) |
|                    |                                           | Mo <sup>5+</sup> | 231.6 (234.7) |
| TMP-2              | Mo 3d <sub>5/2</sub> (3d <sub>3/2</sub> ) | Mo <sup>6+</sup> | 232.6 (235.8) |
|                    |                                           | Mo <sup>5+</sup> | 231.6 (234.7) |



Table S4. S 2p XPS spectra fitting results of PEDOT:PSS and TMP-2.

| Samples   | Region                                   | Assigned to | BE [eV]       |
|-----------|------------------------------------------|-------------|---------------|
| PEDOT:PSS | S 2P <sub>3/2</sub> (3d <sub>1/2</sub> ) | PEDOT       | 163.5 (164.7) |
|           |                                          | PSS         | 167.9 (169.1) |
| TMP-2     | S 3d <sub>3/2</sub> (3d <sub>1/2</sub> ) | PEDOT       | 163.6 (164.7) |
|           |                                          | PSS         | 168.0 (169.2) |

Table S5. Capacitance performance comparison of MXene-based composites.

| Electrode materials                                          | Electrolyte                          | Gravimetric capacitance                           | Volumetric capacitance                              | Ref.         |
|--------------------------------------------------------------|--------------------------------------|---------------------------------------------------|-----------------------------------------------------|--------------|
| Ti <sub>3</sub> C <sub>2</sub> T <sub>x</sub> /RGO           | 1M H <sub>2</sub> SO <sub>4</sub>    | 140 F g <sup>-1</sup><br>at 0.5 A g <sup>-1</sup> | 490 F cm <sup>-3</sup><br>at 0.5 A g <sup>-1</sup>  | 1            |
| Porous MXene/<br>graphene                                    | 3 M H <sub>2</sub> SO <sub>4</sub>   | 383 F g <sup>-1</sup><br>at 1 A g <sup>-1</sup>   | ---                                                 | 2            |
| PS1MXene                                                     | 1 M H <sub>2</sub> SO <sub>4</sub>   | 506 F g <sup>-1</sup><br>at 0.5 A g <sup>-1</sup> | 759 F cm <sup>-3</sup><br>at 0.5 A g <sup>-1</sup>  | 3            |
| MnO <sub>2</sub> /MXene/CC                                   | 3 M KOH                              | 511.2 F/g <sup>-1</sup><br>at 1 A g <sup>-1</sup> | ----                                                | 4            |
| C@Ti <sub>3</sub> C <sub>2</sub>                             | 6 M KOH                              | 250.6 F g <sup>-1</sup><br>at 1 A g <sup>-1</sup> | ---                                                 | 5            |
| WNRs/MXene                                                   | 0.5 M H <sub>2</sub> SO <sub>4</sub> | 297 F g <sup>-1</sup><br>at 1 A g <sup>-1</sup>   | ---                                                 | 6            |
| MXene-650                                                    | 1 M H <sub>2</sub> SO <sub>4</sub>   | 442 F g <sup>-1</sup><br>at 0.5 A g <sup>-1</sup> | 1590 F cm <sup>-3</sup><br>at 0.5 A g <sup>-1</sup> | 7            |
| Ti <sub>3</sub> C <sub>2</sub> T <sub>x</sub> /BiOCl         | 1 M KOH                              | 247.8 F g <sup>-1</sup><br>at 1 A g <sup>-1</sup> | 396.5 F cm <sup>3</sup><br>at 1 A g <sup>-1</sup>   | 8            |
| i-PANI@Ti <sub>3</sub> C <sub>2</sub> T <sub>x</sub>         | 1 M H <sub>2</sub> SO <sub>4</sub>   | 310 F g <sup>-1</sup><br>at 1 A g <sup>-1</sup>   | 1001 F cm <sup>3</sup><br>at 1 A g <sup>-1</sup>    | 9            |
| Ti <sub>3</sub> C <sub>2</sub> T <sub>x</sub> /PANI          | 3 M H <sub>2</sub> SO <sub>4</sub>   | 503 F g <sup>-1</sup><br>at 2 mV s <sup>-1</sup>  | 1682 F cm <sup>-3</sup><br>at 2 mV s <sup>-1</sup>  | 10           |
| PPy/Ti <sub>3</sub> C <sub>2</sub> T <sub>x</sub>            | 1 M H <sub>2</sub> SO <sub>4</sub>   | 416 F g <sup>-1</sup><br>at 5 mV s <sup>-1</sup>  | 1000 F cm <sup>-3</sup><br>at 5 mV s <sup>-1</sup>  | 11           |
| MoO <sub>3-x</sub> /d-Ti <sub>3</sub> C <sub>2</sub>         | 5 M LiCl                             | ---                                               | 631 F cm <sup>-3</sup><br>at 1 A g <sup>-1</sup>    | 12           |
| MXene/<br>PEDOT:PSS                                          | 1 M H <sub>2</sub> SO <sub>4</sub>   | ---                                               | 1310 F cm <sup>-3</sup><br>at 2 mV s <sup>-1</sup>  | 13           |
| Ti <sub>3</sub> C <sub>2</sub> T <sub>x</sub> /<br>PEDOT:PSS | 1 M H <sub>2</sub> SO <sub>4</sub>   | 286 F g <sup>-1</sup><br>at 2 mV s <sup>-1</sup>  | 1065 F cm <sup>-3</sup><br>at 2 mV s <sup>-1</sup>  | 14           |
| TMP-2                                                        | 1 M H <sub>2</sub> SO <sub>4</sub>   | 523.0 F g <sup>-1</sup><br>at 1A g <sup>-1</sup>  | 1898.5 F cm <sup>-3</sup><br>at 1A g <sup>-1</sup>  | This<br>work |

Table S6. Summary of maximum total capacitance ( $C_T$ ), double-layer capacitance ( $C_{dl}$ ) and pseudocapacitance ( $C_p$ ) for TMP-2 electrodes from the plots of  $q$  vs.  $v^{1/2}$  and  $q^{-1}$  vs.  $v^{1/2}$ .

| $C_T$                   | $C_{dl}$                | $C_p$                   | $C_{dl}/C_T$ |
|-------------------------|-------------------------|-------------------------|--------------|
| 714.3 F g <sup>-1</sup> | 475.4 F g <sup>-1</sup> | 238.9 F g <sup>-1</sup> | 66.6 %       |

Table S7. Fitting values of the equivalent circuit elements of samples.

| Equivalent circuit elements | Samples                                       |                                                                   |                                                          |         |         |         |
|-----------------------------|-----------------------------------------------|-------------------------------------------------------------------|----------------------------------------------------------|---------|---------|---------|
|                             | Ti <sub>3</sub> C <sub>2</sub> T <sub>x</sub> | Ti <sub>3</sub> C <sub>2</sub> T <sub>x</sub> /MoO <sub>3-x</sub> | Ti <sub>3</sub> C <sub>2</sub> T <sub>x</sub> /PEDOT:PSS | TMP-1   | TMP-2   | TMP-3   |
| $R_s$ (Ω)                   | 1.403                                         | 1.301                                                             | 1.295                                                    | 1.237   | 0.990   | 1.128   |
| $CPE_T$                     | 0.00034                                       | 0.00020                                                           | 0.00024                                                  | 0.00029 | 0.00038 | 0.00036 |
| $CPE_p$                     | 0.92105                                       | 1.028                                                             | 1.027                                                    | 0.97187 | 0.97455 | 0.96985 |
| $R_{ct}$ (Ω)                | 0.62806                                       | 0.4838                                                            | 0.30346                                                  | 0.57109 | 0.48538 | 0.59812 |
| $W_R$                       | 1.343                                         | 1.659                                                             | 0.95604                                                  | 1.002   | 0.8472  | 1.091   |
| $W_T$                       | 0.47173                                       | 0.61306                                                           | 0.46029                                                  | 0.38657 | 0.48587 | 0.50857 |
| $W_P$                       | 0.48168                                       | 0.47268                                                           | 0.47391                                                  | 0.47509 | 0.45841 | 0.47547 |

$CPE_T$  is the specific capacitance value when  $CPE_P=1$ ;

$CPE_P$  is the constant phase element index;

$W_R$  is the diffusion impedance (Warburg diffusion impedance);

$W_T$  is the diffusion time constant;

$W_P$  is the fractional exponent between 0 and 1.

Table S8. The capacitance performance comparison of Mxene-based supercapacitors

| Supercapacitors                                                                                                | Electrolyte                               | Gravimetric capacitance                             | Volumetric capacitance                               | Ref.         |
|----------------------------------------------------------------------------------------------------------------|-------------------------------------------|-----------------------------------------------------|------------------------------------------------------|--------------|
| Ti <sub>3</sub> C <sub>2</sub> T <sub>x</sub> @PEDOT//<br>Ti <sub>3</sub> C <sub>2</sub> T <sub>x</sub> @PEDOT | 1 M H <sub>2</sub> SO <sub>4</sub>        | 100 F g <sup>-1</sup><br>at 1 A g <sup>-1</sup>     | ---                                                  | 15           |
| d-Ti <sub>3</sub> C <sub>2</sub> /NF//b-Ti <sub>3</sub> C <sub>2</sub>                                         | 6 M KOH                                   | 51.1 F g <sup>-1</sup><br>at 0.5 A g <sup>-1</sup>  | ---                                                  | 16           |
| Ti <sub>3</sub> C <sub>2</sub> T <sub>x</sub> //rGO/<br>CNT/PANI                                               | PVA/H <sub>2</sub> SO <sub>4</sub><br>gel | 116.9 F g <sup>-1</sup><br>at 10 mV s <sup>-1</sup> | 286 F cm <sup>-3</sup><br>at 10 mV s <sup>-1</sup>   | 17           |
| MnO <sub>2</sub> /MXene/CC//<br>MnO <sub>2</sub> /MXene/CC                                                     | PVA/KOH gel                               | 94.67 F/g <sup>-1</sup><br>at 1 A g <sup>-1</sup>   | ---                                                  | 4            |
| C@Ti <sub>3</sub> C <sub>2</sub> //C@Ti <sub>3</sub> C <sub>2</sub>                                            | 6 M KOH                                   | 53.8 F g <sup>-1</sup><br>at 1 A g <sup>-1</sup>    | ---                                                  | 5            |
| DMSO-<br>MXene//DMSO-<br>MXene                                                                                 | PVA/KOH gel                               | 74 F g <sup>-1</sup><br>at 1 A g <sup>-1</sup>      | ---                                                  | 18           |
| MXene/NCF//<br>MXene/NCF                                                                                       | PVA/KOH gel                               | 63 F g <sup>-1</sup><br>at 1 A g <sup>-1</sup>      | 519 mF cm <sup>-3</sup><br>at 1 A g <sup>-1</sup>    | 19           |
| MXene/PEDOT:PSS//<br>MXene/PEDOT:PSS                                                                           | PVA/H <sub>2</sub> SO <sub>4</sub><br>gel | ---                                                 | 361.4 F cm <sup>-3</sup><br>at 2 mV s <sup>-1</sup>  | 20           |
| MoO <sub>3-x</sub> /d-Ti <sub>3</sub> C <sub>2</sub> //NAC                                                     | 5 M LiCl                                  | ---                                                 | 79.3 F cm <sup>-3</sup><br>at 1 A g <sup>-1</sup>    | 12           |
| Ti <sub>3</sub> C <sub>2</sub> T <sub>x</sub> /BiOCl//<br>Ti <sub>3</sub> C <sub>2</sub> T <sub>x</sub> /BiOCl | 1 M KOH                                   | ---                                                 | 64.3 F cm <sup>-3</sup><br>at 0.5 A g <sup>-1</sup>  | 8            |
| Ti <sub>3</sub> C <sub>2</sub> T <sub>x</sub> //<br>PANI@Ti <sub>3</sub> C <sub>2</sub> T <sub>x</sub>         | 3 M H <sub>2</sub> SO <sub>4</sub>        | 87.3 F g <sup>-1</sup><br>at 10 mV s <sup>-1</sup>  | 298.5 F cm <sup>-3</sup><br>at 10 mV s <sup>-1</sup> | 21           |
| TMP-2//TMP-2                                                                                                   | PVA/H <sub>2</sub> SO <sub>4</sub><br>gel | 128.5 F g <sup>-1</sup><br>at 1 A g <sup>-1</sup>   | 466.4 F cm <sup>-3</sup><br>at 1 A g <sup>-1</sup>   | This<br>work |

## References

- 1 Y. Zhou, K. Maleski, B. Anasori, J. O. Thostenson, Y. Pang, Y. Feng, K. Zeng, C. B. Parker, S. Zauscher, Y. Gogotsi, J. T. Glass, C. Cao, ACS nano, 2020, **14**, 3576-3586.
- 2 X. Yang, Q. Wang, K. Zhu, K. Ye, G. Wang, D. Cao, J. Yan, Adv. Funct. Mater., 2021, **31**, 2101087.
- 3 M. Yao, Y. Chen, Z. Wang, C. Shao, J. Dong, Q. Zhang, L. Zhang, X. Zhao, Chem. Eng. J., 2020, **395**, 124057.
- 4 H. Zhou, Y. Lu, F. Wu, L. Fang, H. Luo, Y. Zhang, M. Zhou, J. Alloys Compd., 2019, **802**, 259-268.

- 5 Z. Pan, X. Ji, *J. Power Sources*, 2019, **439**, 227068.
- 6 C. Peng, Z. Kuai, T. Zeng, Y. Yu, Z. Li, J. Zuo, S. Chen, S. Pan, L. Li, *J. Alloys Compd.*, 2019, **810**, 151928.
- 7 X. Zhao, Z. Wang, J. Dong, T. Huang, Q. Zhang, L. Zhang, *J. Power Sources*, 2020, **470**, 228356.
- 8 Q. X. Xia, N. M. Shinde, J. M. Yun, T. Zhang, R. S. Mane, S. Mathur, K. H. Kim, *Electrochim. Acta*, 2018, **271**, 351-360.
- 9 Y. Zhou, Y. Zou, Z. Peng, C. Yu, W. Zhong, *Nanoscale*, 2020, **12**, 20797-20810.
- 10 A. V. Mohammadi, J. Moncada, H. Chen, E. Kayali, J. Orangi, C. A. Carrero, *J. Mater. Chem. A*, 2018, **6**, 22123-22133.
- 11 M. Boota, B. Anasori, C. Voigt, M.-Q. Zhao, M. W. Barsoum, Y. Gogotsi, *Adv. Mater.*, 2016, **28**, 1517-1522.
- 12 W. Zheng, J. Halim, A. S. Etman, A. E. Ghazaly, J. Rosen, M. W. Barsoum, *Electrochim. Acta*, 2021, **370**, 137665.
- 13 L. Qin, Q. Tao, A. E. Ghazaly, J. F.-Rodriguez, P. O. Å. Persson, J. Rosen, F. Zhang, *Adv. Funct. Mater.*, 2017, **28**, 1703808.
- 14 L. Li, N. Zhang, M. Zhang, X. Zhang, Z. Zhang, *Dalton Trans.*, 2019, **48**, 1747-1756.
- 15 Z. Liu, L. Wang, Y. Xu, J. Guo, S. Zhang, Y. Lu, *J. Electroanal. Chem.*, 2021, **881**, 114958.
- 16 J. Guo, Y. Zhao, A. Liu, T. Ma, *Electrochim. Acta*, 2019, **305**, 164-174.
- 17 K. Li, X. Wang, X. Wang, M. Liang, V. Nicolosi, Y. Xu, Y. Gogotsi, *Nano Energy*, 2020, **75**, 104971.
- 18 G. Gao, S. Yang, S. Wang, L. Li, *Scripta Materialia*, 2022, **213**, 114605.
- 19 L. Sun, G. Song, Y. Sun, Q. Fu, C. Pan, *ACS Appl. Mater. Interfaces*, 2020, **12**, 44777-44788.
- 20 J. Zhang, S. Seyedin, S. Qin, Z. Wang, S. Moradi, F. Yang, P. A. Lynch, W. Yang, J. Liu, X. Wang, J. M. Razal, *Small*, 2019, **15**, 1804732.
- 21 K. Li, X. Wang, S. Li, P. Urbankowski, J. Li, Y. Xu, Y. Gogotsi, *Small*, 2020, **16**, 1906851.
